# Supplementary material for: The non-pathogenic Australian rabbit calicivirus RCV-A1 provides temporal and partial cross protection to lethal Rabbit Haemorrhagic Disease Virus infection which is not dependent on antibody titres
Source: PubMed Central journal article supplement (PMC3733936; doi:10.1186/1297-9716-44-51), 2013-07-08
Supplement: 1297-9716-44-51-S1.pdf [file 1297-9716-44-51-S1.pdf]

| Rabbit ID | Antibodies cross reacting to RHDV                     |             |             |             |             |            |           | RCV-A1 antibodies |            |            |             |             |            |              |              |              |              |             |                |                |           |  |
|-----------|-------------------------------------------------------|-------------|-------------|-------------|-------------|------------|-----------|-------------------|------------|------------|-------------|-------------|------------|--------------|--------------|--------------|--------------|-------------|----------------|----------------|-----------|--|
|           | IgG                                                   |             |             |             | IgM         |            |           | CELISA            | IgG        |            |             |             | IgM        |              | IgA          |              |              |             | bELISA         |                |           |  |
|           | Week 0                                                | Week 3      | Week 4      | Week 8      | Week 0      | Week 3     | week 8    | Week 0            | Week 3     | Week 4     | Week 8      | Week 0      | Week 3     | Week 0       | Week 3       | Week 4       | Week 8       | Week 0      | Week 3         | Week 4         | Week 8    |  |
|           | <b>Rabbits culled for virus isolation</b>             |             |             |             |             |            |           |                   |            |            |             |             |            |              |              |              |              |             |                |                |           |  |
| 13        | -                                                     | -           |             |             | -           | D          |           |                   |            |            |             |             |            |              |              |              |              |             |                |                |           |  |
| 22        | -                                                     | -           |             |             | -           | -          |           |                   |            |            |             |             |            |              |              |              |              |             |                |                |           |  |
| 41        | -                                                     | 80          |             |             | pos         | -          |           |                   |            |            |             |             |            |              |              |              |              |             |                |                |           |  |
|           | <b>Group 1</b>                                        |             |             |             |             |            |           |                   |            |            |             |             |            |              |              |              |              |             |                |                |           |  |
|           | <b>&lt; 8 weeks between RCV-A1 and RHDV infection</b> |             |             |             |             |            |           |                   |            |            |             |             |            |              |              |              |              |             |                |                |           |  |
| 11        | -                                                     | <b>40</b>   | <b>640</b>  | <b>640</b>  | -           | <b>Pos</b> | -         | -                 | <b>Pos</b> | <b>Pos</b> | <b>2560</b> | -           | <b>Pos</b> | -            | <b>2560</b>  | <b>10240</b> | <b>2560</b>  | -           | <b>160</b>     | <b>80</b>      | <b>80</b> |  |
| 18        | -                                                     | <b>160</b>  | <b>40</b>   | <b>640</b>  | -           | -          | -         | -                 | <b>Pos</b> | <b>Pos</b> | <b>320</b>  | -           | -          | -            | <b>640</b>   | <b>2560</b>  | -            | -           | <b>20</b>      | <b>40</b>      | <b>10</b> |  |
| 40        | -                                                     | -           | <b>80</b>   | <b>40</b>   | -           | -          | -         | <b>D</b>          | <b>Pos</b> | <b>Pos</b> | <b>320</b>  | -           | -          | -            | <b>10240</b> | <b>2560</b>  | -            | <b>10</b>   | <b>20</b>      | <b>20</b>      | <b>10</b> |  |
| 7         | -                                                     | -           | <b>40</b>   | <b>160</b>  | -           | -          | -         | <b>D</b>          | <b>Pos</b> | <b>Pos</b> | <b>640</b>  | -           | -          | -            | <b>2560</b>  | <b>2560</b>  | -            | <b>20</b>   | <b>80</b>      | <b>80</b>      | <b>20</b> |  |
| 29        | -                                                     | -           | -           | <b>D</b>    | -           | -          | -         | -                 | <b>D</b>   | <b>D</b>   | <b>D</b>    | -           | -          | -            | <b>640</b>   | <b>5120</b>  | -            | -           | <b>20</b>      | <b>20</b>      | -         |  |
| 31        | -                                                     | <b>D</b>    | <b>D</b>    | -           | -           | -          | -         | -                 | <b>Pos</b> | <b>Pos</b> | <b>640</b>  | -           | -          | -            | <b>2560</b>  | <b>2560</b>  | -            | -           | <b>40</b>      | <b>20</b>      | -         |  |
| 36        | -                                                     | <b>D</b>    | <b>80</b>   | <b>640</b>  | -           | -          | -         | -                 | <b>Pos</b> | <b>Pos</b> | <b>2560</b> | -           | -          | -            | <b>10240</b> | <b>5120</b>  | <b>2560</b>  | <b>D</b>    | <b>80</b>      | <b>80</b>      | <b>80</b> |  |
| 37        | -                                                     | -           | <b>40</b>   | <b>160</b>  | -           | -          | -         | -                 | <b>Pos</b> | <b>Pos</b> | <b>2560</b> | -           | <b>Pos</b> | -            | <b>2560</b>  | <b>10240</b> | <b>640</b>   | -           | <b>20</b>      | <b>20</b>      | -         |  |
|           | <b>Group 2</b>                                        |             |             |             |             |            |           |                   |            |            |             |             |            |              |              |              |              |             |                |                |           |  |
|           | <b>8-10 weeks between RCV-A1 and RHDV infection</b>   |             |             |             |             |            |           |                   |            |            |             |             |            |              |              |              |              |             |                |                |           |  |
| 25        | <b>160</b>                                            | <b>640</b>  | <b>40</b>   | <b>40</b>   | -           | -          | -         | <b>Pos</b>        | <b>Pos</b> | <b>Pos</b> | <b>320</b>  | <b>Pos</b>  | -          | <b>2560</b>  | <b>2560</b>  | <b>640</b>   | -            | <b>80</b>   | <b>80</b>      | <b>80</b>      | <b>20</b> |  |
| 20        | <i>n.d.</i>                                           | -           | -           | <b>160</b>  | <i>n.d.</i> | -          | -         | <i>n.d.</i>       | <b>pos</b> | <b>pos</b> | <b>1280</b> | <i>n.d.</i> | <b>Pos</b> | <i>n.d.</i>  | -            | <b>640</b>   | -            | <i>n.d.</i> | <b>80</b>      | <b>80</b>      | <b>40</b> |  |
| 28        | -                                                     | <b>D</b>    | <b>D</b>    | <b>40</b>   | -           | -          | -         | <b>D</b>          | <b>Pos</b> | <b>Pos</b> | <b>80</b>   | <b>Pos</b>  | -          | <b>1280</b>  | <b>5120</b>  | <b>2560</b>  | -            | <b>80</b>   | <b>80</b>      | <b>20</b>      | -         |  |
| 38        | -                                                     | <b>160</b>  | <b>80</b>   | <b>160</b>  | -           | -          | -         | <b>D</b>          | <b>Pos</b> | <b>Pos</b> | <b>2560</b> | <b>Pos</b>  | -          | <b>40960</b> | <b>2560</b>  | <b>5120</b>  | <b>160</b>   | <b>20</b>   | <b>80</b>      | <b>20</b>      | <b>80</b> |  |
| 39        | <b>D</b>                                              | <b>160</b>  | <b>40</b>   | -           | -           | -          | -         | -                 | <b>Pos</b> | <b>Pos</b> | <b>160</b>  | -           | -          | <b>5120</b>  | <b>10240</b> | <b>5120</b>  | <b>640</b>   | <b>20</b>   | <b>20</b>      | <b>20</b>      | <b>10</b> |  |
| 44        | -                                                     | -           | <b>40</b>   | <b>320</b>  | -           | <b>D</b>   | -         | <b>D</b>          | <b>Pos</b> | <b>Pos</b> | <b>640</b>  | <b>Pos</b>  | <b>Pos</b> | <b>2560</b>  | <b>10240</b> | <b>5120</b>  | <b>160</b>   | <b>80</b>   | <b>20</b>      | <b>20</b>      | <b>10</b> |  |
| 47        | <b>320</b>                                            | <b>2560</b> | <b>1280</b> | <b>1280</b> | -           | -          | -         | <b>Pos</b>        | <b>Pos</b> | <b>Pos</b> | <b>2560</b> | <b>Pos</b>  | -          | <b>20480</b> | <b>10240</b> | <b>40960</b> | <b>2560</b>  | <b>80</b>   | <b>&gt;160</b> | <b>&gt;160</b> | <b>80</b> |  |
| 50        | <i>n.d.</i>                                           | -           | -           | <b>160</b>  | <i>n.d.</i> | -          | -         | <i>n.d.</i>       | -          | <b>D</b>   | <b>640</b>  | <i>n.d.</i> | <b>Pos</b> | <i>n.d.</i>  | <b>640</b>   | <b>2560</b>  | <b>640</b>   | <i>n.d.</i> | <b>20</b>      | <b>20</b>      | <b>20</b> |  |
|           | <b>Group 3</b>                                        |             |             |             |             |            |           |                   |            |            |             |             |            |              |              |              |              |             |                |                |           |  |
|           | <b>&gt;10 weeks between RCV-A1 and RHDV infection</b> |             |             |             |             |            |           |                   |            |            |             |             |            |              |              |              |              |             |                |                |           |  |
| 32        | <b>2560</b>                                           | <b>2560</b> | <b>5120</b> | <b>2560</b> | -           | -          | <b>10</b> | <b>Pos</b>        | <b>Pos</b> | <b>Pos</b> | <b>2560</b> | -           | -          | <b>2560</b>  | <b>2560</b>  | <b>5120</b>  | <b>2560</b>  | <b>80</b>   | <b>&gt;160</b> | <b>&gt;160</b> | <b>80</b> |  |
| 2         | 20480                                                 | 20480       | 10240       | 2560        | -           | <b>D</b>   | -         | <b>Pos</b>        | <b>Pos</b> | <b>Pos</b> | 5120        | -           | -          | 2560         | 2560         | 2560         | 1280         | >160        | >160           | >160           | 80        |  |
| 3         | 640                                                   | 5210        | 2560        | 2560        | -           | -          | -         | <b>Pos</b>        | <b>Pos</b> | <b>Pos</b> | 2560        | -           | -          | 640          | 2560         | 2560         | 1280         | 80          | 80             | 80             | 80        |  |
| 4         | 320                                                   | 40          | 80          | 80          | -           | -          | -         | <b>Pos</b>        | <b>Pos</b> | <b>Pos</b> | 1280        | -           | -          | 640          | 640          | 160          | -            | -           | -              | -              | -         |  |
| 6         | 2560                                                  | 2560        | 2560        | 2560        | -           | -          | -         | <b>Pos</b>        | <b>Pos</b> | <b>Pos</b> | 2560        | -           | -          | 2560         | 2560         | 5120         | 2560         | 80          | 80             | 160            | 80        |  |
| 8         | 640                                                   | 640         | 640         | 640         | -           | -          | -         | <b>Pos</b>        | <b>Pos</b> | <b>Pos</b> | 160         | -           | -          | 10240        | 10240        | 10240        | 1280         | 20          | 80             | 80             | 20        |  |
| 12        | 2560                                                  | 1280        | 1280        | 10240       | -           | -          | -         | <b>Pos</b>        | <b>Pos</b> | <b>Pos</b> | 5120        | -           | -          | 10240        | 640          | 2560         | 2560         | 40          | 80             | 80             | 80        |  |
| 15        | 320                                                   | 640         | 2560        | 640         | -           | -          | -         | <b>Pos</b>        | <b>Pos</b> | <b>Pos</b> | 320         | -           | -          | 10240        | 640          | 2560         | -            | 80          | 20             | 20             | -         |  |
| 16        | -                                                     | -           | -           | -           | -           | -          | -         | <b>Pos</b>        | <b>Pos</b> | <b>Pos</b> | 640         | -           | -          | -            | 640          | 2560         | 1280         | -           | 20             | 40             | 10        |  |
| 17        | 160                                                   | 640         | 320         | 640         | -           | -          | -         | <b>Pos</b>        | <b>Pos</b> | <b>Pos</b> | 160         | -           | -          | 2560         | 640          | 2560         | 1280         | 20          | 20             | 40             | -         |  |
| 19        | 5120                                                  | 5120        | 640         | 640         | -           | -          | -         | <b>Pos</b>        | <b>Pos</b> | <b>Pos</b> | 640         | -           | -          | 5120         | 640          | 640          | -            | 160         | 80             | 80             | 20        |  |
| 21        | 160                                                   | 1280        | 640         | 640         | -           | <b>D</b>   | -         | <b>Pos</b>        | <b>Pos</b> | <b>Pos</b> | 80          | -           | -          | 2560         | 40960        | 5120         | 5120         | 10          | 80             | 80             | -         |  |
| 23        | 1280                                                  | 5120        | 2560        | 2560        | -           | -          | -         | <b>Pos</b>        | <b>Pos</b> | <b>Pos</b> | 5120        | -           | -          | 5120         | 10240        | 640          | 2560         | 80          | 80             | 80             | 80        |  |
| 24        | 5120                                                  | 5120        | 2560        | 2560        | -           | -          | -         | <b>Pos</b>        | <b>Pos</b> | <b>Pos</b> | 2560        | -           | -          | 2560         | 2560         | 640          | -            | 80          | 80             | 80             | 20        |  |
| 26        | -                                                     | <b>D</b>    | <b>40</b>   | <b>160</b>  | -           | -          | -         | <b>Pos</b>        | <b>Pos</b> | <b>Pos</b> | 320         | -           | -          | 2560         | 2560         | 640          | -            | 20          | 20             | 20             | -         |  |
| 27        | 160                                                   | <b>D</b>    | <b>D</b>    | <b>80</b>   | -           | -          | -         | <b>Pos</b>        | <b>Pos</b> | <b>Pos</b> | 160         | -           | -          | 2560         | -            | -            | -            | 20          | -              | -              | -         |  |
| 33        | 10240                                                 | 10240       | 2560        | 2560        | -           | -          | -         | <b>Pos</b>        | <b>Pos</b> | <b>Pos</b> | 2560        | -           | -          | 2560         | 10240        | 10240        | 2560         | 80          | >160           | >160           | 80        |  |
| 45        | 10240                                                 | 10240       | 10240       | 2560        | -           | -          | -         | <b>Pos</b>        | <b>Pos</b> | <b>Pos</b> | 5120        | -           | -          | 40960        | 10240        | 5120         | 2560         | >160        | 80             | >160           | 80        |  |
|           | <b>Rabbits with unknown infection history</b>         |             |             |             |             |            |           |                   |            |            |             |             |            |              |              |              |              |             |                |                |           |  |
| 30        | <i>n.d.</i>                                           | <b>160</b>  | <b>160</b>  | <b>640</b>  | <i>n.d.</i> | -          | -         | <i>n.d.</i>       | <b>Pos</b> | <b>Pos</b> | <b>640</b>  | <i>n.d.</i> | -          | <i>n.d.</i>  | <b>40960</b> | <b>10240</b> | <b>10240</b> | <i>n.d.</i> | <b>80</b>      | <b>80</b>      | <b>40</b> |  |
| 1         | <i>n.d.</i>                                           | 2560        | 2560        | 1280        | <i>n.d.</i> | -          | -         | <i>n.d.</i>       | <b>Pos</b> | <b>Pos</b> | 2560        | <i>n.d.</i> | -          | <i>n.d.</i>  | 10240        | 640          | -            | <i>n.d.</i> | >160           | 20             | 20        |  |
| 5         | <i>n.d.</i>                                           | n           | 80          | 40          | <i>n.d.</i> | -          | -         | <i>n.d.</i>       | <b>Pos</b> | <b>Pos</b> | 160         | <i>n.d.</i> | -          | <i>n.d.</i>  | 640          | 2560         | -            | <i>n.d.</i> | 20             | 80             | -         |  |
| 10        | <i>n.d.</i>                                           | <b>D</b>    | 40          | 40          | <i>n.d.</i> | -          | -         | <i>n.d.</i>       | <b>Pos</b> | <b>Pos</b> | 640         | <i>n.d.</i> | -          | <i>n.d.</i>  | 640          | 2560         | 2560         | <i>n.d.</i> | 20             | 20             | 0         |  |
| 14        | <i>n.d.</i>                                           | 40960       | 40960       | 40960       | <i>n.d.</i> | -          | -         | <i>n.d.</i>       | <b>Pos</b> | <b>Pos</b> | 10240       | <i>n.d.</i> | -          | <i>n.d.</i>  | 10240        | 10240        | 10240        | <i>n.d.</i> | >160           | >160           | 80        |  |
| 34        | <i>n.d.</i>                                           | 160         | 40          | 160         | <i>n.d.</i> | -          | -         | <i>n.d.</i>       | <b>Pos</b> | <b>Pos</b> | 640         | <i>n.d.</i> | -          | <i>n.d.</i>  | 10240        | 2560         | -            | <i>n.d.</i> | 160            | 80             | 20        |  |
| 35        | <i>n.d.</i>                                           | 160         | 80          | 160         | <i>n.d.</i> | -          | -         | <i>n.d.</i>       | <b>Pos</b> | <b>Pos</b> | 2560        | <i>n.d.</i> | -          | <i>n.d.</i>  | 160          | 320          | -            | <i>n.d.</i> | 10             | -              | -         |  |
| 42        | <i>n.d.</i>                                           | 640         | 320         | 320         | <i>n.d.</i> | -          | -         | <i>n.d.</i>       | <b>Pos</b> | <b>Pos</b> | 640         | <i>n.d.</i> | -          | <i>n.d.</i>  | 10240        | 2560         | 640          | <i>n.d.</i> | 20             | 20             | -         |  |
| 43        | <i>n.d.</i>                                           | -           | -           | -           | <i>n.d.</i> | -          | -         | <i>n.d.</i>       | <b>Pos</b> | <b>Pos</b> | 320         | <i>n.d.</i> | -          | <i>n.d.</i>  | 640          | 640          | 160          | <i>n.d.</i> | 80             | 80             | 20        |  |
| 46        | <i>n.d.</i>                                           | 640         | 640         | 640         | <i>n.d.</i> | -          | -         | <i>n.d.</i>       | <b>Pos</b> | <b>Pos</b> | 2560        | <i>n.d.</i> | -          | <i>n.d.</i>  | 2560         | 640          | -            | <i>n.d.</i> | 80             | 80             | 80        |  |
| 48        | <i>n.d.</i>                                           | -           | -           | 640         | <i>n.d.</i> | -          | 20        | <i>n.d.</i>       | <b>Pos</b> | <b>Pos</b> | 1280        | <i>n.d.</i> | -          | <i>n.d.</i>  | -            | 160          | -            | <i>n.d.</i> | 20             | 40             | 20        |  |
| 49        | <i>n.d.</i>                                           | 160         | 320         | 320         | <i>n.d.</i> | -          | -         | <i>n.d.</i>       | <b>Pos</b> | <b>Pos</b> | 10240       | <i>n.d.</i> | -          | <i>n.d.</i>  | 2560         | 2560         | 640          | <i>n.d.</i> | 20             | 20             | 20        |  |

Minus (-) indicates a negative test result.  
D= Equivocal; N.d. = not determined.  
No animal had IgM antibodies at week 4 or 8.  
Animals surviving the RHDV challenge are in bold italics.
